# Supplementary material
Source: PubMed Central journal article supplement (PMC8378394)
Supplement: bcr-2021-243609supp001.pdf [file bcr-2021-243609supp001.pdf]

**Relevant Normal Lab Values:**

Blood urea nitrogen – 8-20 mg/dL

Creatine, serum – 0.7-1.3 mg/dL

Hemoglobin – Male: 14-17 g/dL (140-170 g/L)

Lactate 0.5 – 2.0 mmol/L

Leukocyte Count (white blood cell count) – 4-10 K/uL (0-0.01 cells\* 10<sup>9</sup>/L)

Procalcitonin – 0-0.05 ng/ml
