# Supplementary material
Source: PubMed Central journal article supplement (PMC8378394)
Supplement: bcr-2021-243609supp002.pdf [file bcr-2021-243609supp002.pdf]

**Haemodialysis Prescription:**

Intermittent haemodialysis was performed via a right, internal jugular tunneled dialysis catheter. An Optiflux 200 dialyzer was used with blood flow (Qb) 350 ml/min and dialysate flow rate (Qd) 700 ml/min. The dialysate concentrate allowed for a bath with Na 138 mmol/L, K 2 mmol/L and Ca 2.5 mmol/L. The dialysate HCO<sub>3</sub> was 35 mmol/L and the bath was warmed to a temperature of 35C. The initial session was performed over 3.5 hours and 1-2 liters of fluid was ultrafiltered per session depending on the patient's volume status and weight.
